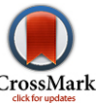

## Correction

# Correction: HMGB1 Is Associated with Atherosclerotic Plaque Composition and Burden in Patients with Stable Coronary Artery Disease

## The PLOS ONE Staff

Dr. Bjoern Maack is not included in the author byline. He should be listed as the third author, and his affiliation is 1: Department of Cardiology, University of Heidelberg, Heidelberg, Germany.

The contributions of this author are as follows: performed the experiments, contributed reagents/materials/analysis/tools, wrote the manuscript.

The correct citation is: Andrassy M, Volz HC, Maack B, Schuessler A, Gitsioudis G, Hofmann N, et al. (2012) HMGB1 Is Associated with Atherosclerotic Plaque Composition and Burden in Patients with Stable Coronary Artery Disease. PLoS ONE 7(12): e52081. doi:10.1371/journal.pone.0052081

## Reference

1. Andrassy M, Volz HC, Schuessler A, Gitsioudis G, Hofmann N, et al. (2012) HMGB1 Is Associated with Atherosclerotic Plaque Composition and Burden in Patients with Stable Coronary Artery Disease. PLoS ONE 7(12): e52081. doi:10.1371/journal.pone.0052081

**Citation:** The PLOS ONE Staff (2014) Correction: HMGB1 Is Associated with Atherosclerotic Plaque Composition and Burden in Patients with Stable Coronary Artery Disease. PLoS ONE 9(5): e99246. doi:10.1371/journal.pone.0099246

**Published:** May 28, 2014

**Copyright:** © 2014 The PLOS ONE Staff. This is an open-access article distributed under the terms of the Creative Commons Attribution License, which permits unrestricted use, distribution, and reproduction in any medium, provided the original author and source are credited.
